# Supplementary material
Source: PubMed Central journal article supplement (PMC2810711)
Supplement: NIHMS167146-supplement-1_si_001.pdf [file NIHMS167146-supplement-1_si_001.pdf]

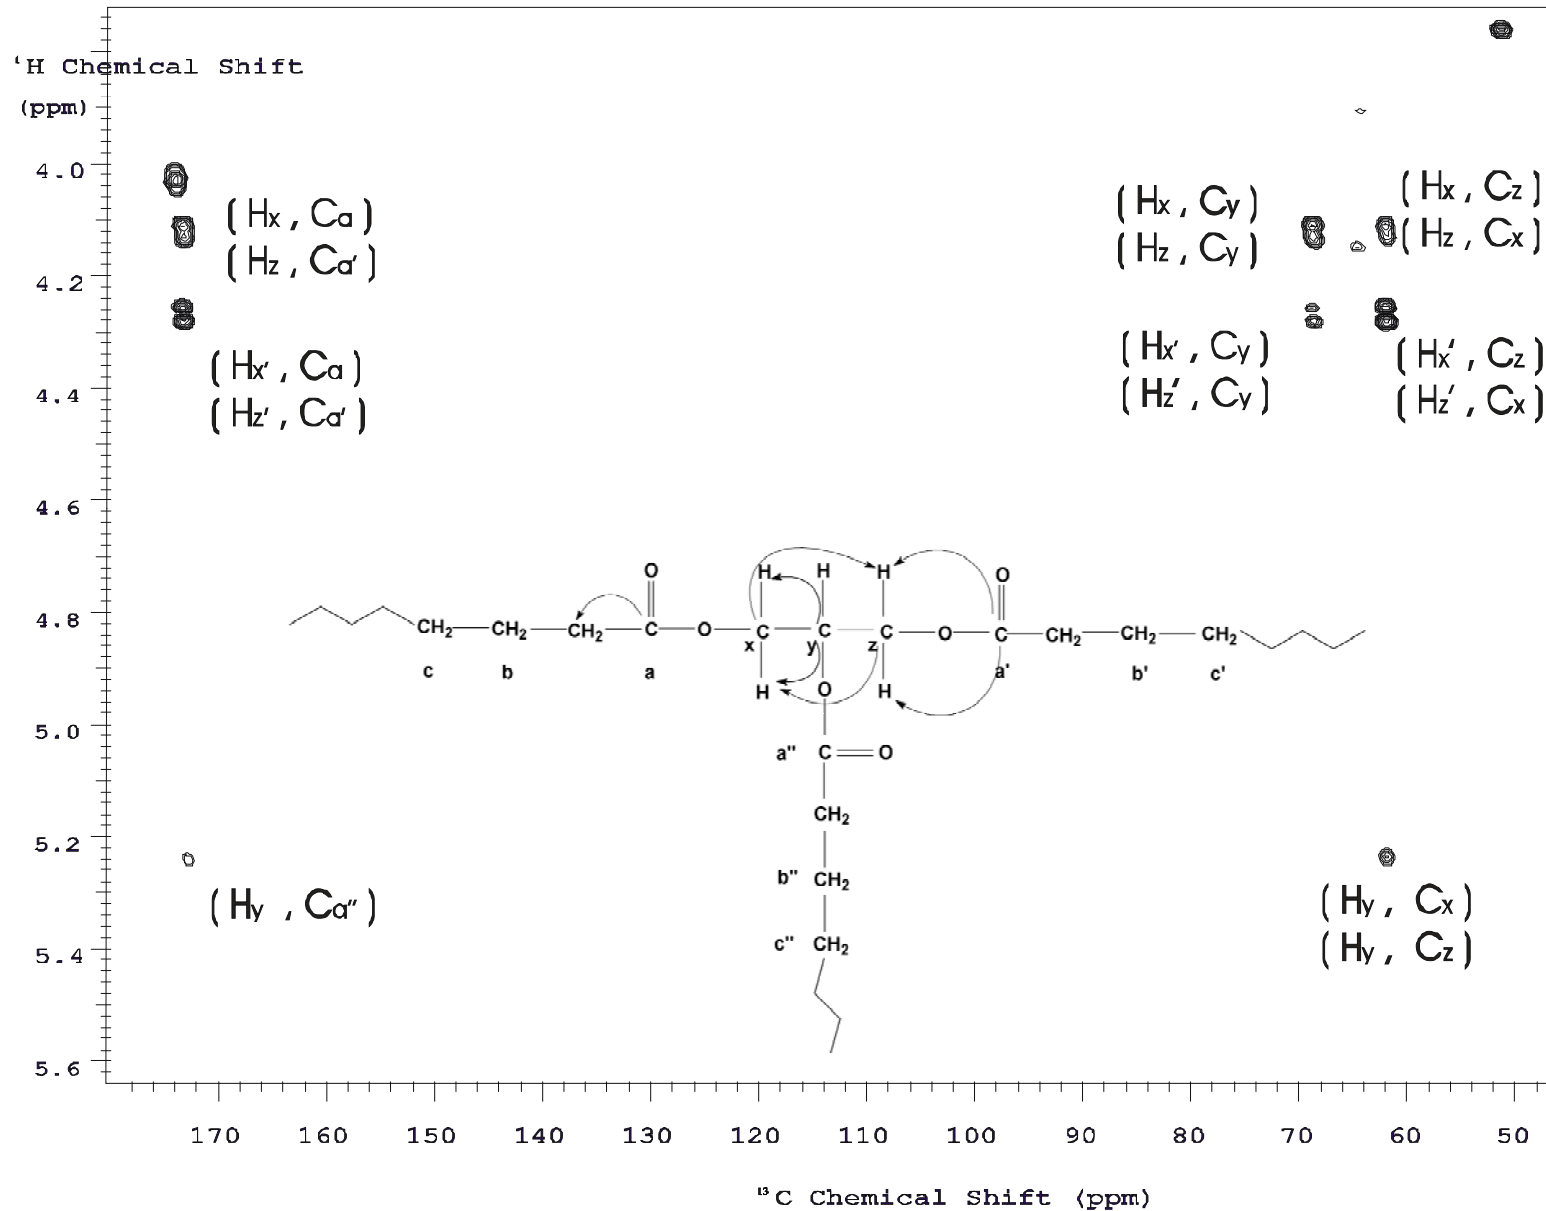

Figure A1. 2D HMBC contour plot of Compound 2, showing a long-range bonded network of  $^1\text{H}$ - $^{13}\text{C}$  pairs and an isolated peak (4.03, 174 ppm) from an ester oligomer.
