# Supplementary material
Source: PubMed Central journal article supplement (PMC2810711)
Supplement: NIHMS167146-supplement-2_si_002.pdf [file NIHMS167146-supplement-2_si_002.pdf]

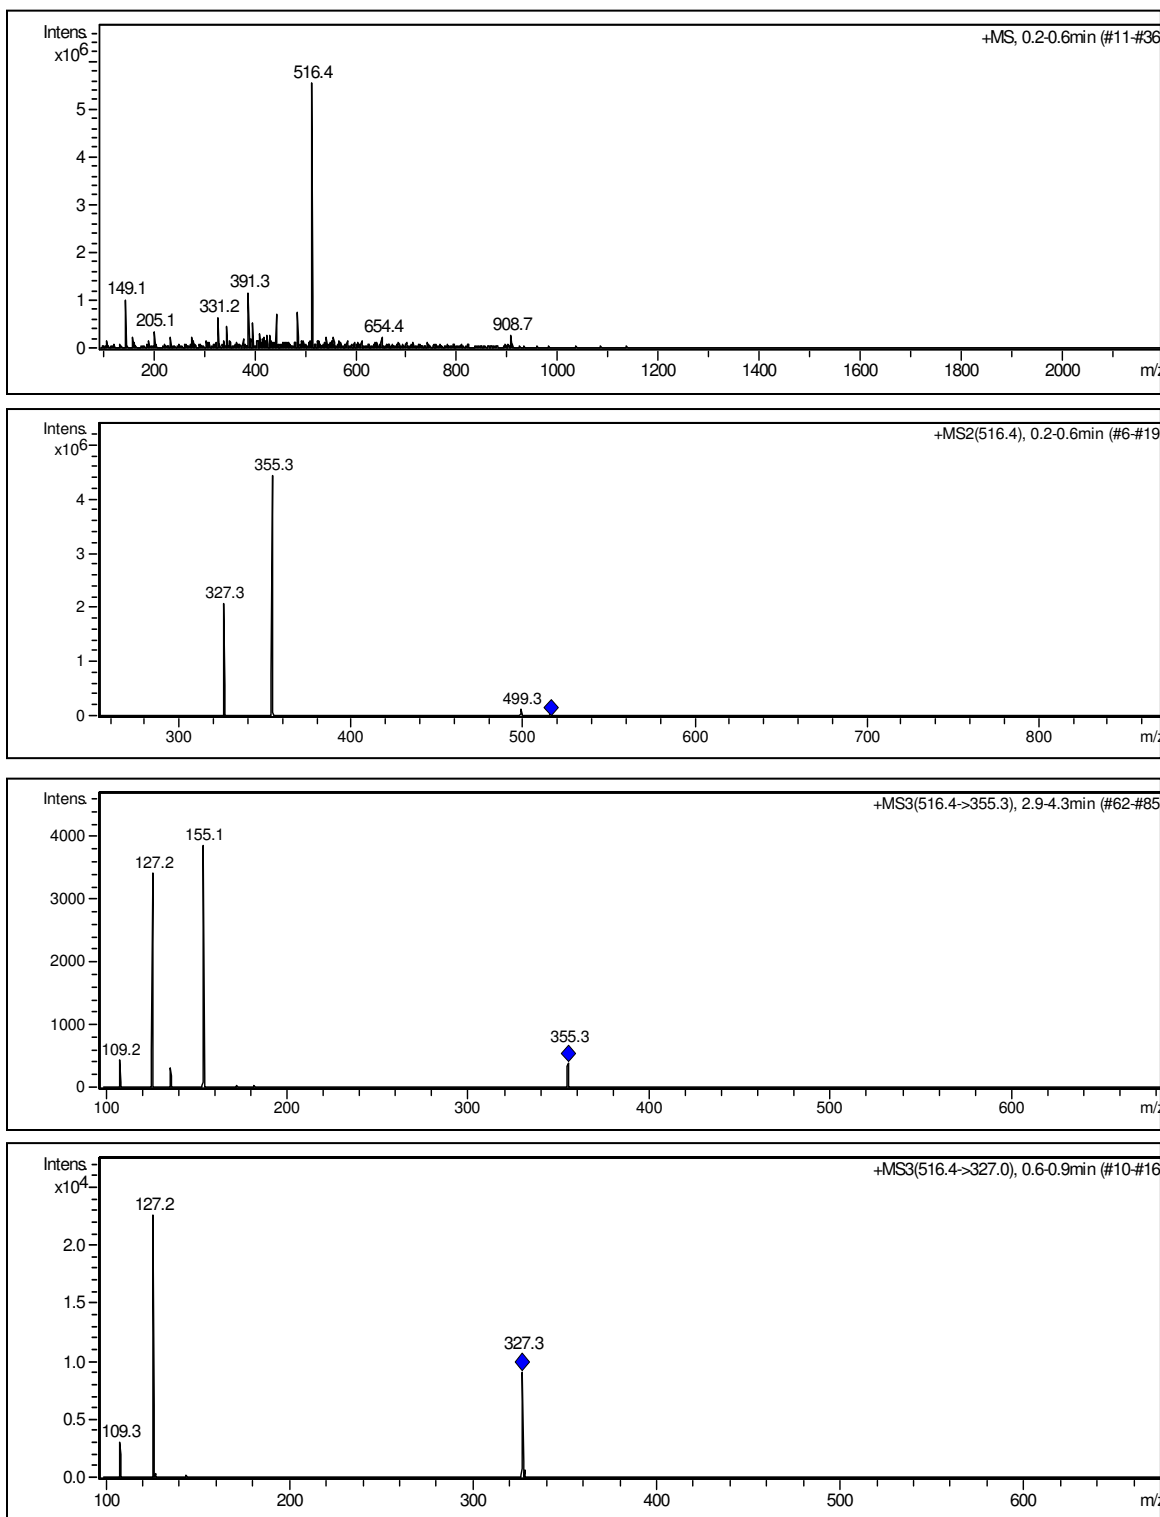

Figure A2. APCI-MS (top panel) and APCI-MS<sup>n</sup> (three bottom panels) of Compound **2**, plotted as ion intensity vs. mass-to-charge ratio.
